# Supplementary material
Source: PubMed Central journal article supplement (PMC9337896)
Supplement: KID.0001032022SupplementaryData.pdf [file KID.0001032022SupplementaryData.pdf]

# Supplemental Material

## **Selonsertib Enhances Kidney Protection Beyond Standard of Care in a Hypertensive, Secondary Glomerulosclerosis CKD Model**

Shawn S. Badal et al.

### **Table of Contents**

Supplemental Table 1. Hematocrit and hemoglobin at week 12

Supplemental Figure 1. Selonsertib PK/PD relationship in a rat model of fibrosis

Supplemental Figure 2. Differentially expressed genes with selonsertib and ACEI treatment from longitudinal comparisons

Supplemental Figure 3. Differentially expressed genes with selonsertib, ACEI or combination treatment from end-of-study comparisons

Supplemental Figure 4. Single-Cell RNA-Seq violin plots of genes down-regulated in selonsertib and enalapril combination longitudinal comparisons.

Supplemental Figure 4. Single-Cell RNA-Seq violin plots of genes up-regulated in selonsertib and enalapril combination longitudinal comparisons.

**Supplemental Table 1. Hematocrit and hemoglobin at week 12**

|                                       | <b>Control</b> | <b>ACEI</b> | <b>ACEI+SEL</b> | <b>SEL</b> |
|---------------------------------------|----------------|-------------|-----------------|------------|
| Hct, %                                | 39.49±2.26     | 35.85±1.09  | 42.34±2.15      | 36.38±2.85 |
| RBC, 10 <sup>6</sup> /mm <sup>3</sup> | 7.60±0.41      | 6.88±0.19   | 8.27±0.47       | 6.96±0.53  |
| Hb, g/dl                              | 13.84±0.79     | 12.44±0.45  | 14.87±0.83      | 12.68±1.04 |
| Retic, %                              | 0.07±0.03      | 0.06±0.03   | 0.04±0.02       | 0.14±0.07  |

Data are shown as mean±SEM. n = 9–12 animals per group. ACEI, angiotensin converting enzyme inhibitor; Hb, hemoglobin; Hct, hematocrit; RETIC, reticulocyte count; RBC, red blood cells; SEL, selonsertib; SEM, standard error of the mean.

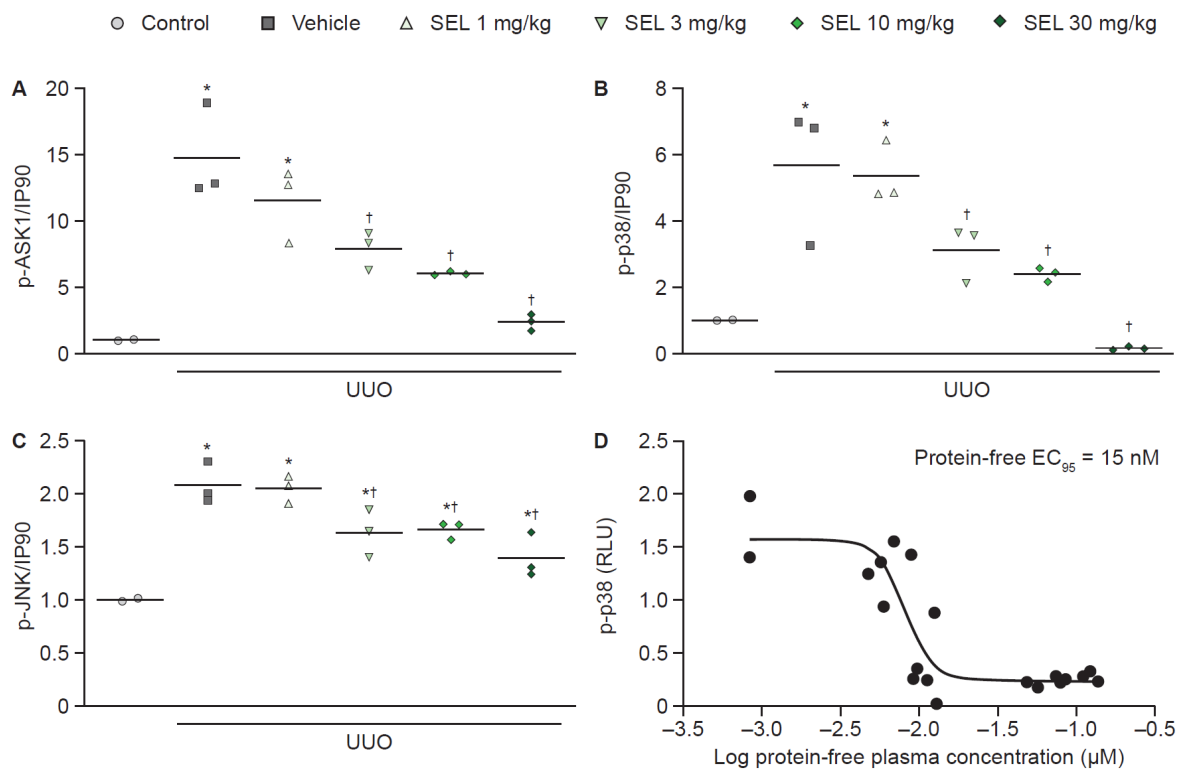

**Supplemental Figure 1. Selonsertib PK/PD relationship in a rat model of tubulointerstitial fibrosis.** Selonsertib (1–30 mg/kg, orally, twice daily) was administered to Sprague-Dawley rats for 7 days following unilateral ureteral obstruction (UUO) surgery. Quantification of western blot signals demonstrated significant decreases in (A) p-ASK1, (B) p-p38 and (C) p-JNK in kidney cortex as compared to UUO animals treated with vehicle (n = 6–10). Data are presented as individual data points per animal (horizontal bar shows mean). \**P*<0.05 vs control (sham surgery), †*P*<0.05 vs vehicle; ANOVA followed by Newman-Keuls multiple comparison test. (D) Correlation between the level of p-p38 in the kidney cortex and the plasma concentration of selonsertib in individual animals at trough on day 7. p-p38 was measured by an ELISA. Data were analyzed by GraphPad Prism 5 software using nonlinear regression curve fitting with variable slope to determine the EC<sub>95</sub> value. ANOVA, analysis of variance; ASK1, apoptosis signal-regulating kinase 1; EC<sub>95</sub>, effective concentration required to inhibit 95%; ELISA, enzyme-linked immunosorbent assay; JNK, c-Jun N-terminal kinase; PD, pharmacodynamic; PK, pharmacokinetic; RLU, relative light unit; SD, standard deviation; SEL, selonsertib.

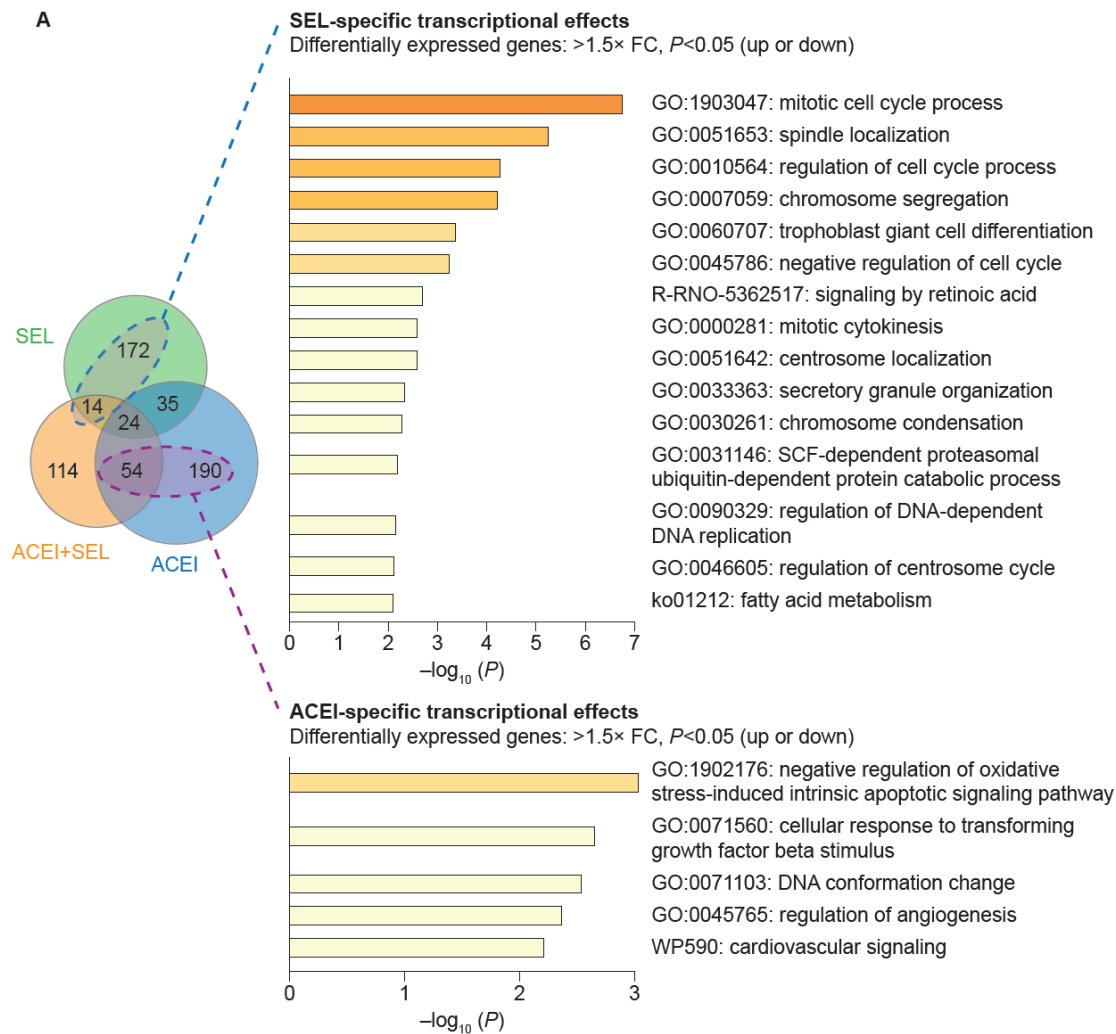

**B**

| SEL            |                | ACEI           |                |
|----------------|----------------|----------------|----------------|
| Upregulated    | Downregulated  | Upregulated    | Downregulated  |
| <b>Gene ID</b> | <b>Gene ID</b> | <b>Gene ID</b> | <b>Gene ID</b> |
| Fam122b        | Rtkn           | Hmgn5          | Zmiz2          |
| Moap1          | Slco1a6        | Fam122b        | Hnrnpab        |
| Cr2            | Nat8b          | Ugt2a1         | Bag511         |
| Scd            | Fabp4          | U11            | Ebna1bp2       |
| Olr300         | Tmem132b       | Pcsk9          | Ciart          |
| Nudt10         | Pdk4           | U5             | Abl1           |
| Snap91         | Zbtb8b         | Olr338         | Chi3l1         |
| Hmgn5          | Iqch           | Fbp2           | Rnd1           |
| Plk4           | Cndp1          | Chchd7         | Tmem266        |
| Kif2c          | Kcnh1          | Hacd1          | Fer1l6         |

**Supplemental Figure 2. Differentially expressed genes with selonsertib and ACEI treatment from longitudinal comparisons.** (A) Significantly affected molecular pathways (B) Genes specifically modified by each treatment. ACEI, angiotensin-converting enzyme inhibitor; FC, fold change; SEL, selonsertib.

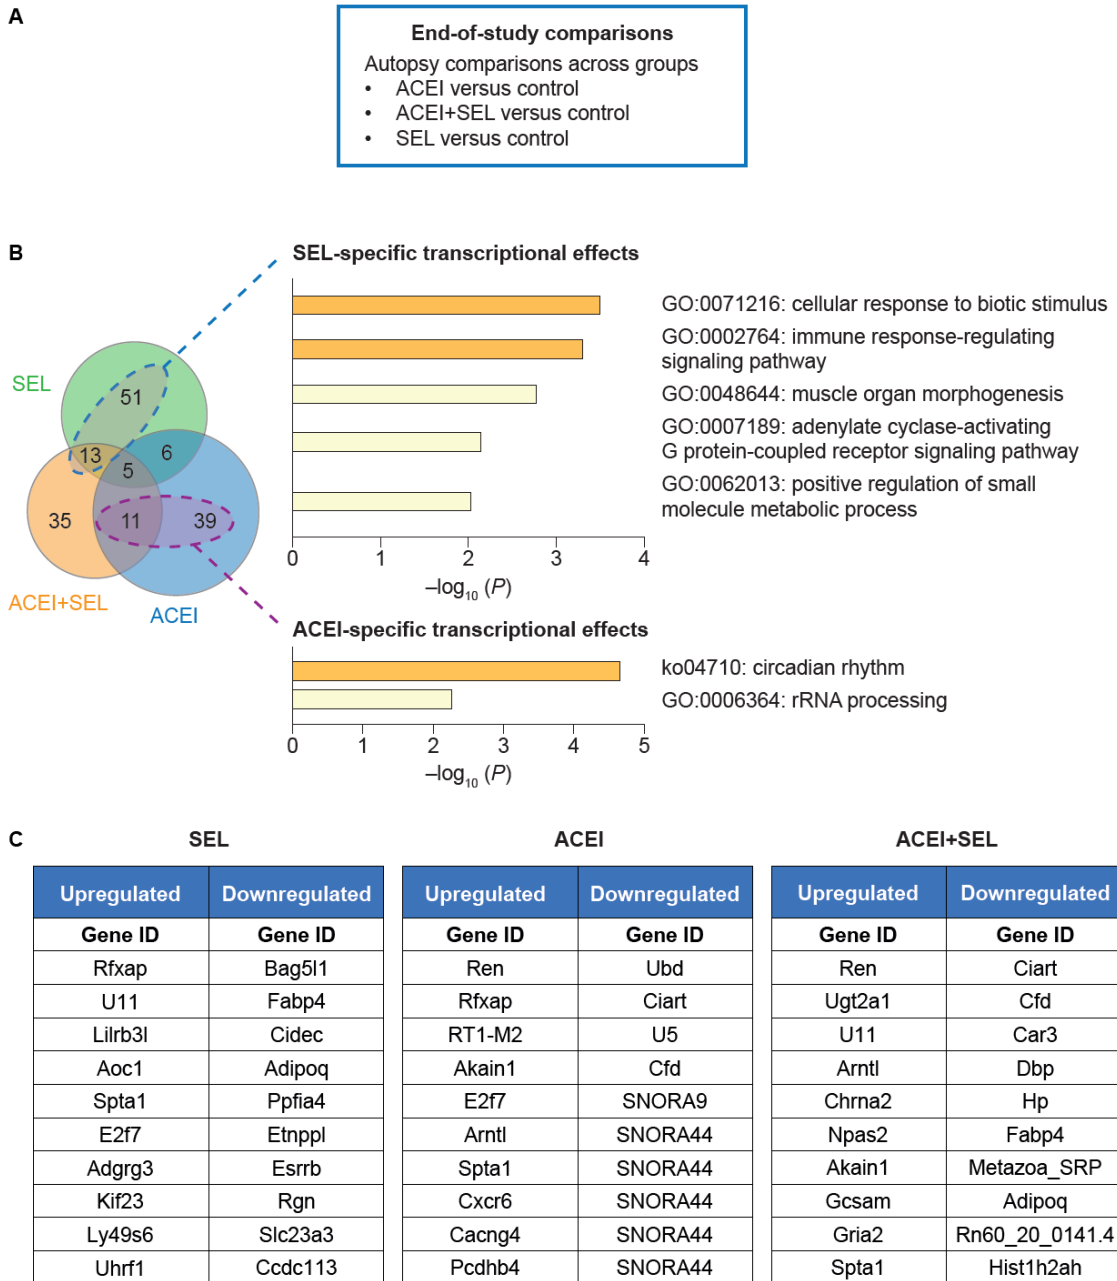

**Supplemental Figure 3. Differentially expressed genes with selonsertib, ACEI or combination treatment from end-of-study comparisons.** (A) Comparisons across groups. (B) Overlap of differentially expressed genes (B) Genes specifically modified by each treatment. ACEI, angiotensin-converting enzyme inhibitor; FC, fold change; SEL, selonsertib.



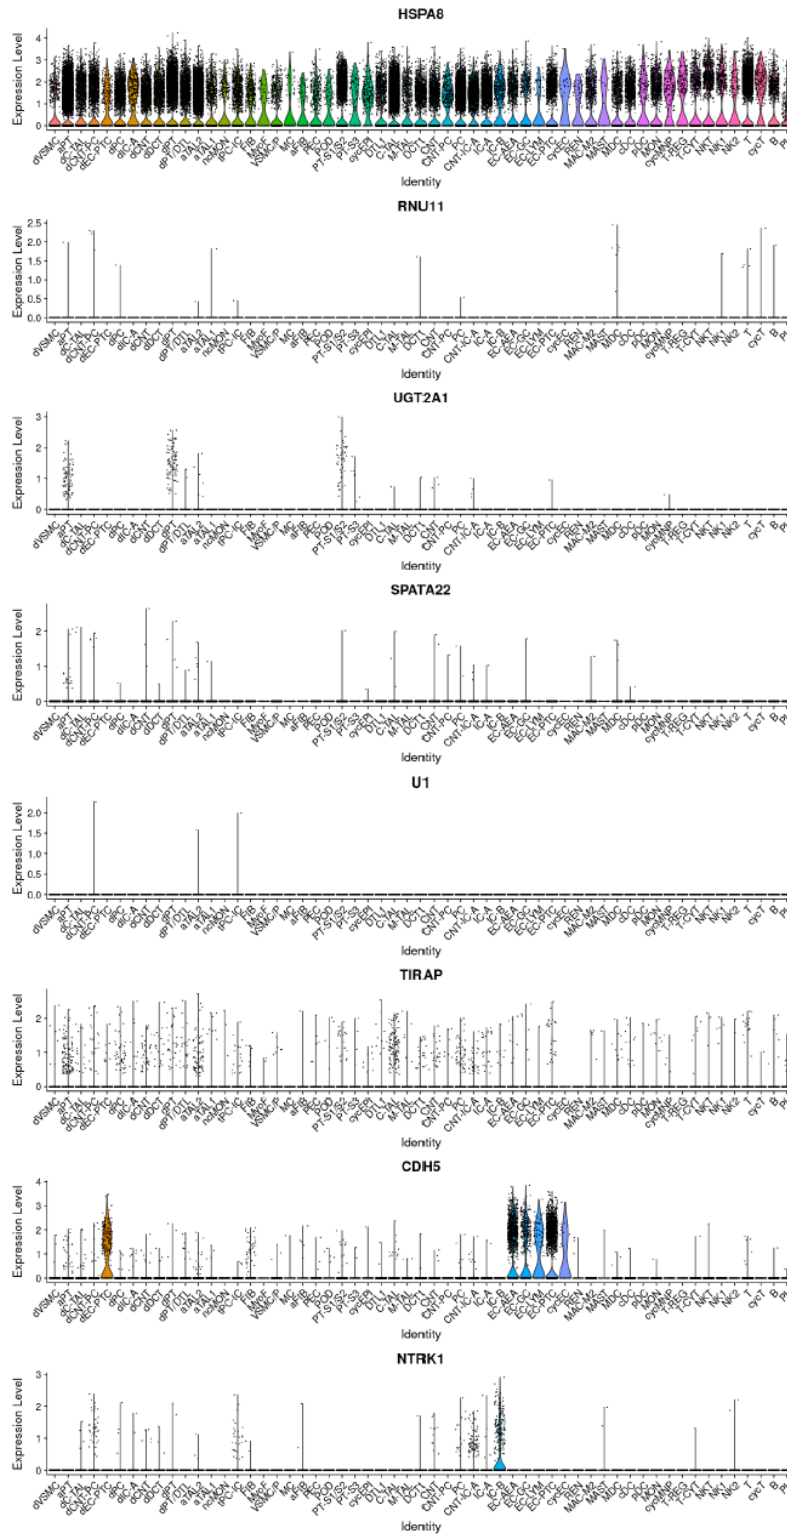

**Supplemental Figure 5. Single-Cell RNA-Seq violin plots of genes up-regulated in selonsertib and enalapril combination longitudinal comparisons.** Data obtained from Kidney Precision Medicine Project Atlas ([www.kpmp.org/atlas](http://www.kpmp.org/atlas)).
